# Supplementary material for: Cell-tailored calcium carbonate particles with different crystal forms from nanoparticle to nano/microsphere
Source: Royal Society of Chemistry journal article supplement (doi:10.1039/d0ra07393h), 2020-01-01
Supplement: d0ra07393h1.pdf [file d0ra07393h1.pdf]

## Supporting Information

### Cell-tailored calcium carbonate particles with different crystal forms from nanoparticle to nano/microsphere

Yi Chang,<sup>a</sup> Huijuan Han,<sup>b</sup> Tingting Liu,<sup>a</sup> Shibao Yuan<sup>b</sup>, Shuting Chen<sup>a</sup>, Yuming Guo<sup>\*b</sup>, Lin Yang<sup>a</sup>  
and Xiaoming Ma<sup>\*a</sup>

### Table of Contents

|                                                                                                                                |          |
|--------------------------------------------------------------------------------------------------------------------------------|----------|
| <b>Figure S1.</b> The light micrographs of yeast cells before and after proliferation .....                                    | <b>2</b> |
| <b>Figure S2.</b> The zeta potentials of the YC-CaCO <sub>3</sub> NPs.....                                                     | <b>2</b> |
| <b>Figure S3.</b> The SEM and XRD of the CaCO <sub>3</sub> synthesized in the distilled water .....                            | <b>2</b> |
| <b>Figure S4.</b> Absorbance of different concentration of free DOX at 480 nm.....                                             | <b>3</b> |
| <b>Figure S5.</b> The anti-proliferation effects of the YC-CaCO <sub>3</sub> NSs on V79-4 normal cells and HeLa<br>cells ..... | <b>3</b> |

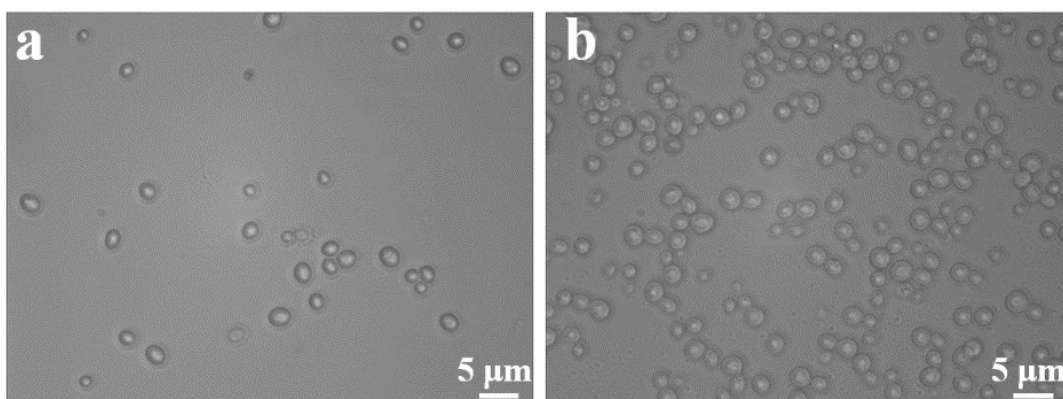

**Figure S1** The light micrographs of yeast cells before and after proliferation.

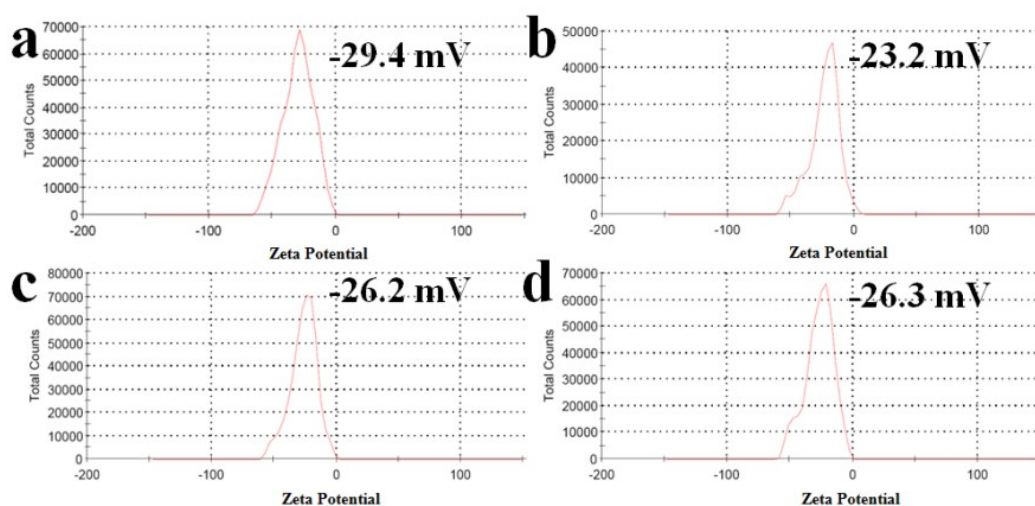

**Figure S2** The zeta potentials of the YC-CaCO<sub>3</sub> NPs with different sizes (from a to d corresponds to the size of 2.3 nm, 3.9 nm, 6.2 nm and 12.2 nm of YC-CaCO<sub>3</sub> NPs, respectively)

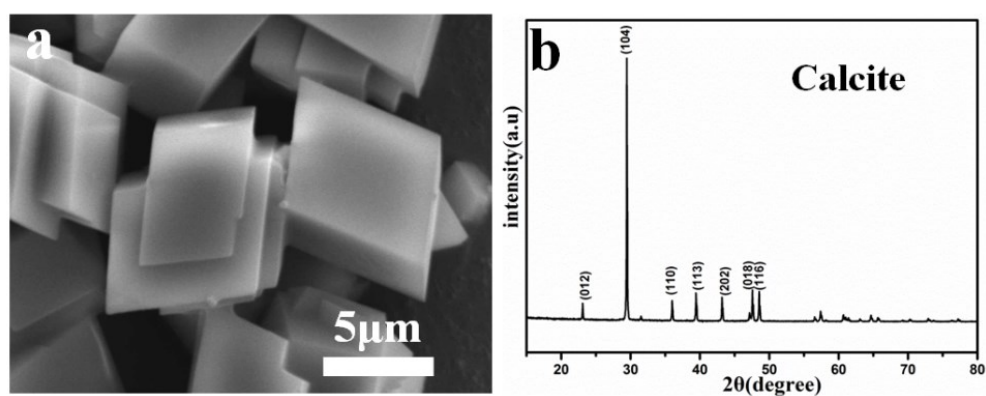

**Figure S3** The SEM and XRD of the CaCO<sub>3</sub> synthesized in the distilled water.

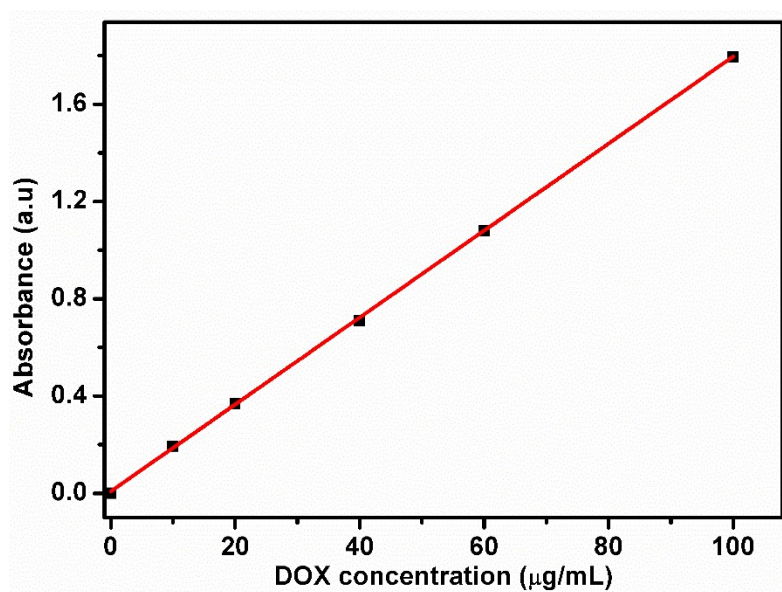

**Figure S4** Absorbance at 480 nm vs. free DOX concentration (optical path = 1 cm). Solid line is the liner fit using the analysis tool in Origin software and the  $R^2 = 0.9999$ .

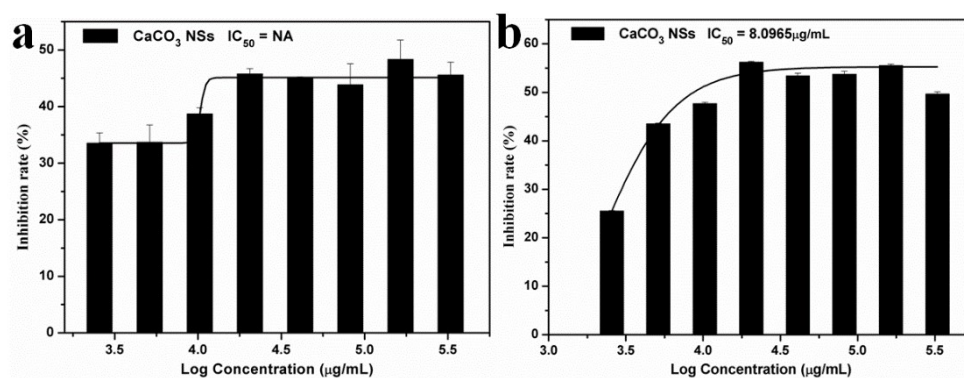

**Figure S5** The anti-proliferation effects of the YC- $\text{CaCO}_3$  NSs on V79-4 normal cells (a) and HeLa cells (b), respectively. Each bar represents the mean  $\pm$  S.D. NA: not available.
